# Supplementary material for: Class 1 Histone Deacetylases and Ataxia-Telangiectasia Mutated Kinase Control the Survival of Murine Pancreatic Cancer Cells upon dNTP Depletion
Source: MDPI journal article supplement (doi:10.3390/cells10102520), 2021-09-23
Supplement: s1 [file s1]

## Supplementary Material

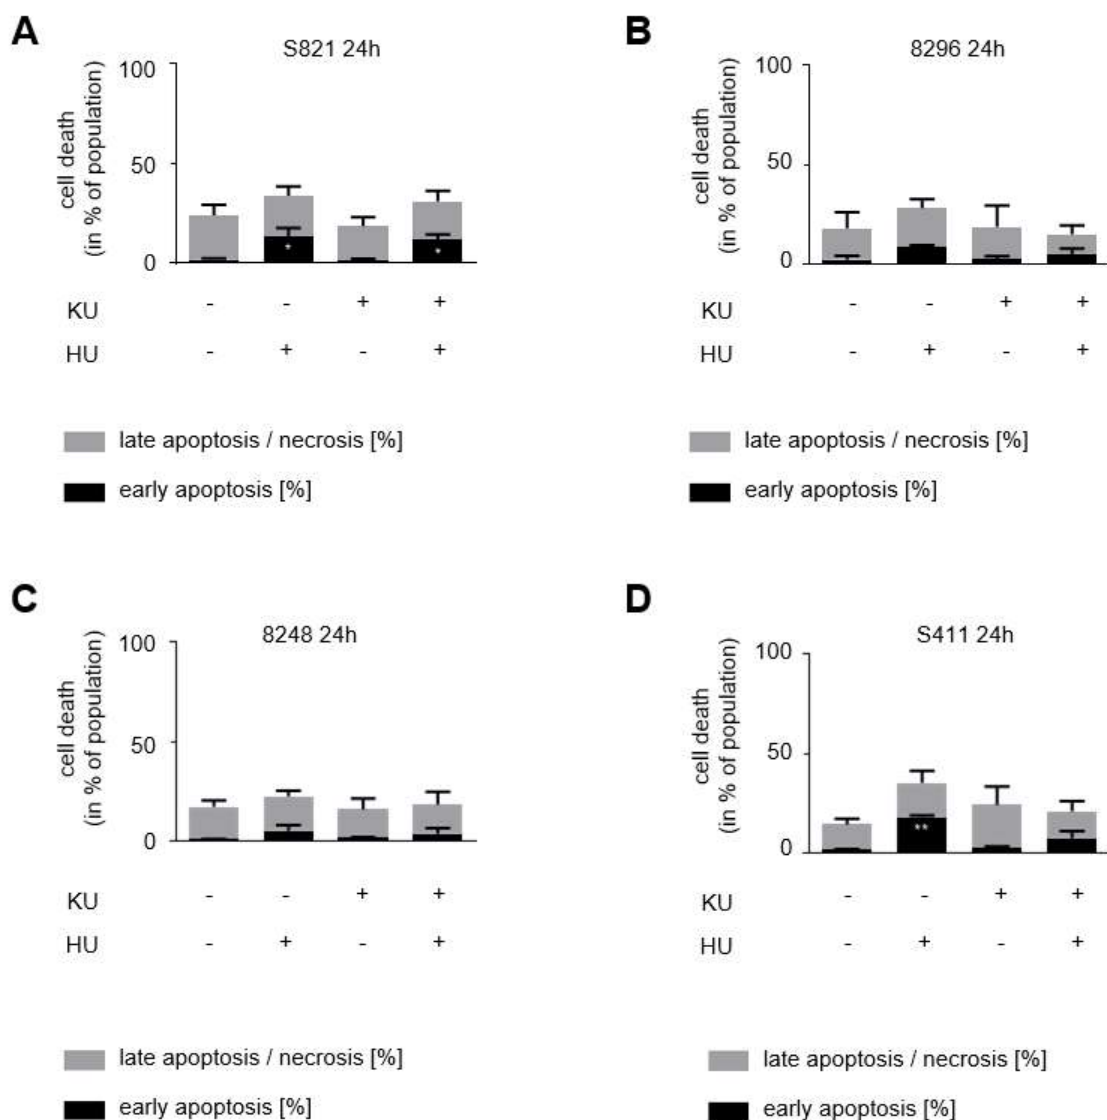

**Figure S1.** Impact of hydroxyurea and KU-60019 on PDAC cells after 24 h. Apoptosis analysis of (A) S821, (B) 8296, (C) 8248 and (D) S411 24 h after a treatment with 5  $\mu$ M KU-60019  $\pm$  1 mM hydroxyurea. Results were determined by flow cytometry using annexin-V-FITC staining and are shown as mean  $\pm$  SD (n=3). The differences in annexin-V positive cells were statistically analyzed using one-way ANOVA (\*p<0.05, \*\*p<0.01).
